# Supplementary material for: Grafting BiOCl nanosheets onto TiO2 tubular arrays to form a hierarchical structure with improved photocatalytic performance
Source: Royal Society of Chemistry journal article supplement (doi:10.1039/c3ra42839g), 2013-01-01
Supplement: c3ra42839g.pdf [file c3ra42839g.pdf]

## Supplementary Information

### **Grafting BiOCl nanosheets onto a TiO<sub>2</sub> tubular array to form a hierarchical structure with improved photocatalytic performance**

Yunyu Cai,<sup>a</sup> Panpan Wang,<sup>a</sup> Yixing Ye,<sup>a</sup> Jun Liu,<sup>a</sup> Zhenfei Tian,<sup>a</sup> Yishu Liu<sup>b</sup> and  
Changhao Liang<sup>a,\*</sup>

<sup>a</sup>Key Laboratory of Materials Physics and Anhui Key Laboratory of Nanomaterials and Nanotechnology, Institute of Solid State Physics, Hefei Institutes of Physical Science, Chinese Academy of Sciences, Hefei 230031, China

<sup>b</sup>Anhui Provincial Laboratory of Biomimetic Sensor and Detecting Technology, West Anhui University, Lu'an, Anhui 237015, PR China.

\*Corresponding author. Tel.: +86 551 65591129; Fax: +86 551 65591434.

E-mail address: chliang@issp.ac.cn (C. H. Liang).

The anodic amorphous  $\text{TiO}_2$  nanotube array film is uniform and orderly in pores distribution as showing in Figure S1. The average diameter and length of the  $\text{TiO}_2$  nanotubes are of 130 nm and 6  $\mu\text{m}$ , respectively. In Figure S2, the nanosheets consisting of  $\text{BiOCl}$  nanospheres shows similar morphology with that of  $\text{BiOCl}$  nanosheets grafted on a  $\text{TiO}_2/\text{Ti}$  film. Figure S3 shows the XRD pattern of as-synthesized  $\text{BiOCl}$  nanospheres.

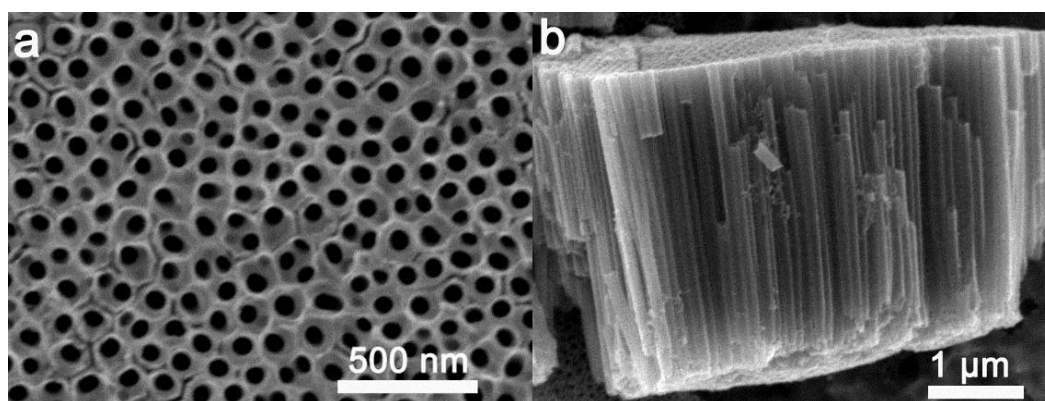

**Figure S1.** (a), (b) Top and side view of amorphous  $\text{TiO}_2$  nanotubes array film by anodic oxidation.

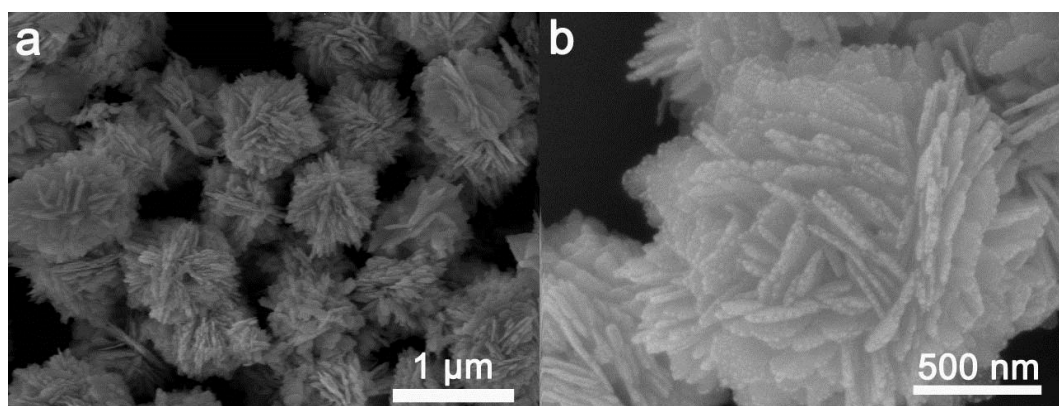

**Figure S2.** (a) SEM image of  $\text{BiOCl}$  flower-like nanospheres; (b) a magnified image of the single nanosphere in (a).

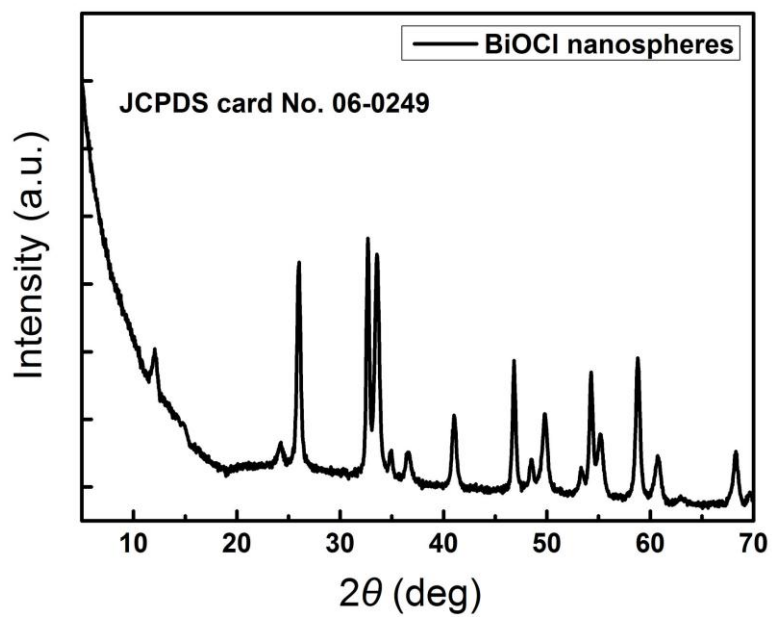

**Figure S3.** XRD pattern of the synthesized BiOCl nanospheres.
